# Supplementary material
Source: PubMed Central journal article supplement (PMC1738113)
Supplement: jnnpsyc_73_5_578__1.pdf [file jnnpsyc_73_5_578__1.pdf]

## Web References

**J Stone, A Carson, SC Lewis, B Thomas, R Goldbeck, CP Warlow, M Sharpe**

**Are functional motor and sensory symptoms really more frequent on the left? a systematic review.**

**2002;73:578-581.**

w1. Lempert T, Dieterich M, Huppert D, Brandt T. Psychogenic disorders in neurology: frequency and clinical spectrum. *Acta Neurol.Scand.* 1990;**82**:335-40.

w2. Kapfhammer HP, Buchheim P, Bove D, Wagner A. Konversionssymptome bei patienten im psychiatrischen konsiliardienst. *Nervenarzt* 1992;**63**:527-38.

w3. Verdugo RJ, Ochoa JL. Reversal of hypoaesthesia by nerve block, or placebo: A psychologically mediated sign in chronic pseudoneuropathic pain patients. *J Neurol.Neurosurg.Psychiatry* 1998;**65**:196-203.

w4. Binzer M, Andersen PM, Kullgren G. Clinical characteristics of patients with motor disability due to conversion disorder: a prospective control group study. *J.Neurol.Neurosurg.Psychiatry* 1997;**63**:83-8.

w5. Folks DG, Ford CV, Regan WM. Conversion symptoms in a general hospital. *Psychosomatics* 1984;**25**:285-.

w6. Lecompte D, Clara A. Associated psychopathology in conversion patients without organic disease. *Acta Psychiatr.Belg.* 1987;**87**:654-61.

w7. Crimlisk HL, Bhatia K, Cope H, David A, Marsden CD, Ron MA. Slater revisited: 6 year follow up study of patients with medically unexplained motor symptoms. *BMJ* 1998;**316**:582-6.

w8. Ehrbar R, Waespe W. Funktionelle Gangstörungen. *Schweiz.Med.Wochenschr.* 1992;**122**:833-41.

w9. Keane JR. Hysterical gait disorders: 60 cases. *Neurology* 1989;**39**:586-9.

- w10. Mullges W, Ferbert A, Buchner H. Transkranielle Magnetstimulation bei psychogenen paresen. *Nervenarzt* 1991;**62**:349-53.
- w11. Weinstein EA, Eck RA, Lyerly OG. Conversion hysteria in Appalachia. *Psychiatry* 1969;**32**:334-41.
- w12. Shapiro AP, Teasell RW. Strategic-behavioral intervention in the in-patient rehabilitation of non-organic (factitious/conversion) motor disorders. *Neurorehabilitation* 1997;**8**:183-92.
- w13. Behr J. The role of physiotherapy in the recovery of patients with conversion disorder. *Physiotherapy Canada* 1996;**48**:197-202.
- w14. Bendefeldt F, Miller LL, Ludwig AM. Cognitive performance in conversion hysteria. *Archives of General Psychiatry* 1976;**33**:1250-4.
- w15. Black SE, O'Brien G, Hassanyeh F. Hysterical conversion states. *Br.J.Psychiatry* 1985;**147**:735.
- w16. Brodtkorb E, Gimse R, Antonaci F, Ellertsen B, Sand T, Sulg I, Sjaastad, O. Hyperventilation syndrome: clinical, ventilatory, and personality characteristics as observed in neurological practice. *Acta Neurologica Scandinavica* 1990;**81**:307-13.
- w17. Caplan LR, Nadelson T. Multiple sclerosis and hysteria. Lessons learned from their association. *JAMA* 1980;**243**:2418-21.
- w18. Carden NL, Schramel DJ. Observations of conversion reactions seen in troops involved in the Vietnam conflict. *Am.J.Psychiatry* 1966;**123**:21-31.
- w19. Cardenas DD, Larson J, Egan KJ. Hysterical paralysis in the upper extremity of chronic pain patients. *Arch.Phys.Med.Rehabil.* 1986;**67**:190-3.
- w20. Chertok L. Hypnosis, hysteria and psychoanalysis. *Annales Medico-Psychologiques* 1982;**140**.
- w21. Critchley EM, Cantor HE. Charcot's hysteria renaissant. *BMJ* 1984;**289**:1785-8.
- w22. Daie N, Witztum E. Short-term strategic treatment in traumatic conversion reactions. *American Journal of Psychotherapy* 1991;**45**:335-47.

- w23. Davison P, Sharpe M, Wade D, Bass C. "Wheelchair" patients with nonorganic disease: a psychological inquiry. *J.Psychosom.Res.* 1999;**47**:93-103.
- w24. Dickes RA. Brief therapy of conversion reactions: an in-hospital technique. *Am.J Psychiatry* 1974;**131**:584-6.
- w25. Dickson H, Cole A, Engel S, Jones RF. Conversion reaction presenting as acute spinal cord injury. *Medical Journal of Australia* 1984;**141**:427-9.
- w26. Diukova G, Liachovitskaia NI, Begliarova AM, Vein AM. Simple quantitative analysis of the Hoover's test in patients with psychogenic and organic paresis (Abstract). *J.Neurol.Sci.* 2001;**187 (Suppl 1)**:S108.
- w27. Fishbain DA, Goldberg M, Khalil TM, Asfour SS, Abdel-Moty E, Meagher BR, Santana R, Rosomoff RS, Rosomoff HL. The utility of electromyographic biofeedback in the treatment of conversion paralysis. *Am.J.Psychiatry* 1988;**145**:1572-5.
- w28. Foong J, Lucas PA, Ron MA. Interrogative suggestibility in patients with conversion disorders. *J.Psychosom.Res.* 1997;**43**:317-21.
- w29. Foong J, Ridding M, Cope H, Marsden CD, Ron MA. Corticospinal function in conversion disorder. *J.Neuropsychiatry Clin.Neurosci.* 1997;**9**:302-3.
- w30. Halliday AM. Computing techniques in neurological diagnosis. *Br.Med.Bull.* 1968;**24**:253-9.
- w31. Honing ML, Kon M. Dysfunctional postures of the hand as part of a conversion reaction. *J.Hand Surg.[Br.]* 1996;**21**:271-5.
- w32. Hoogduin K, Akkermans M, Oudshoorn D, Reinders M. Hypnotherapy and contractures of the hand. *American Journal of Clinical Hypnosis* 1993;**36**:106-12.
- w33. Hop JW, Frijns CJ, van Gijn J. Psychogenic pseudoptosis. *J.Neurol.* 1997;**244**:623-4.

- w34. Howard JE, Dorfman LJ. Evoked potentials in hysteria and malingering. *J.Clin.Neurophysiol.* 1986;**3**:39-49.
- w35. Iserson KV. The emergency amobarbital interview. *Annals of Emergency Medicine* 1980;**9**:513-7.
- w36. Janssen BA, Theiler R, Grob D, Dvorak J. The role of motor evoked potentials in psychogenic paralysis. *Spine* 1995;**20**:608-11.
- w37. Keane JR. Wrong-way deviation of the tongue with hysterical hemiparesis. *Neurology* 1986;**36**:1406-7.
- w38. Keane JR. Hysterical hemiparesis accompanying Bell's palsy. *Neurology* 1993;**43**:1619.
- w39. Khalil TM, Abdel-Moty E, Asfour SS, Fishbain DA, Rosomoff RS, Rosomoff, HL. Functional electric stimulation in the reversal of conversion disorder paralysis. *Arch.Phys.Med.Rehabil.* 1988;**69**:545-7.
- w40. Kimball CP, Blindt K. Some thoughts on conversion. *Psychosomatics* 1982;**23**:647-9.
- w41. Kirshner LA, Kaplan N. Conversion as a manifestation of crisis in the life situation: a report on seven cases of ataxia and paralysis of the lower extremities. *Compr.Psychiatry* 1970;**11**:260-6.
- w42. Klonoff EA, Moore DJ. "Conversion reactions" in adolescents: a biofeedback-based operant approach. *J.Behav.Ther.Exp.Psychiatry* 1986;**17**:179-84.
- w43. Koller W, Lang A, Vetere-Overfield B, Findley L, Cleeves L, Factor S, Singer C, Weiner W. Psychogenic tremors. *Neurology* 1989;**39**:1094-9.
- w44. Lader M, Sartorius N. Anxiety in patients with hysterical conversion symptoms. *J.Neurol.Neurosurg.Psychiatry* 1968;**31**:490-5.
- w45. Lazarus A. Somatic therapy for conversion disorder. *Psychosomatics* 1990;**31**:357-8.
- w46. Levy R, Mushin J. The somatosensory evoked response in patients with hysterical anaesthesia. *J.Psychosom.Res.* 1973;**17**:81-4.

- w47. Lorenz J, Kunze K, Bromm B. Differentiation of conversive sensory loss and malingering by P300 in a modified oddball task. *Neuroreport* 1998;**9**:187-91.
- w48. Marsden CD. Hysteria - a neurologist's view. *Psychol.Med.* 1986;**16**:277-88.
- w49. Marshall JC, Halligan PW, Fink GR, Wade DT, Frackowiak RS. The functional anatomy of a hysterical paralysis. *Cognition* 1997;**64**:B1-B8.
- w50. Mayr N, Zeiler K, Auff E, Zeitlhofer J, Deecke L. Die kortikale magnetstimulation als nachweismethode des nicht-organischen charakters angegebener lähmungen. *Aktuelle Neurologie* 1989;**16**:125-8.
- w51. McComas AJ, Kereshi S, Quinlan J. A method for detecting functional weakness. *J.Neurol.Neurosurg.Psychiatry* 1983;**46**:280-2.
- w52. Meyer BU, Britton TC, Benecke R, Bischoff C, Machetanz J, Conrad B. Motor responses evoked by magnetic brain stimulation in psychogenic limb weakness: diagnostic value and limitations. *J.Neurol.* 1992;**239**:251-5.
- w53. Miller E. Detecting hysterical sensory symptoms: an elaboration of the forced choice technique. *Br.J.Clin.Psychol.* 1986; **25(Pt 3)**:231-2.
- w54. Moene FC, Hoogduin KA, Van Dyck R. The inpatient treatment of patients suffering from (motor) conversion symptoms: a description of eight cases. *Int.J.Clin.Exp.Hypn.* 1998;**46**:171-90.
- w55. Moldofsky H, England RS. Facilitation of somatosensory average-evoked potentials in hysterical anesthesia and pain. *Arch.Gen.Psychiatry* 1975;**32**:193-7.
- w56. Perkin GD, Joseph R. Neurological manifestations of the hyperventilation syndrome. *J.R.Soc.Med.* 1986;**79**:448-50.
- w57. Reismann JL, Singh B. Conversion reactions simulating Guillain-Barre paralysis following suspension of the swine flu vaccination program in the U.S.A. *Australian & New Zealand Journal of Psychiatry* 1978;**12**:127-32.

- w58. Rothermundt M, Driessen M. Chronifizierte dissoziative hemiparese bei borderline-persönlichkeitsstörung. *Psychiatrische Praxis* 1996;**23**:250-1.
- w59. Scharfman MA. Psychotherapeutic approaches. *N.Y.State J.Med.* 1969;**69**:1887-92.
- w60. Schmale AH, Jr. Somatic expressions and consequences of conversion reactions. *N.Y.State J.Med.* 1969;**69**:1878-83.
- w61. Sebastianpillai FJ, Wijesinghe CP. Hysterical paralysis. *Ceylon Med.J.* 1972;**17**:75-9.
- w62. Shalev A, Munitz H. Conversion without hysteria: a case report and review of the literature. *Br.J.Psychiatry* 1986;**148**:198-203.
- w63. Silver FW. Management of conversion disorder. *Am.J.Phys.Med.Rehabil.* 1996;**75**:134-40.
- w64. Solyom C, Solyom L. A treatment program for functional paraplegia/Munchausen syndrome. *J.Behav.Ther.Exp.Psychiatry* 1990;**21**:225-30.
- w65. Stiebel VG, Kirby JV. The amytal interview in the treatment of conversion disorder: Three case reports. *Military Medicine* 1994;**159**:350-3.
- w66. Teasell RW, Shapiro AP. Strategic-behavioral intervention in the treatment of chronic nonorganic motor disorders. *Am.J.Phys.Med.Rehabil.* 1994;**73**:44-50.
- w67. Tiihonen J, Kuikka J, Viinamaki H, Lehtonen J, Partanen J. Altered cerebral blood flow during hysterical paresthesia. *Biol.Psychiatry* 1995;**37**:134-5.
- w68. Tizian C, Berger A, Kunert P. Diagnose und therapie psychogener lähmungen im handbereich. *Handchir.Mikrochir.Plast.Chir* 1985;**17**:280-3.
- w69. Trieschmann RB, Stolov WC, Montgomery ED. An approach to the treatment of abnormal ambulation resulting from conversion reaction. *Arch.Phys.Med.Rehabil.* 1970;**51**:198-206.
- w70. Vatine JJ, Milun M, Avni J. Inpatient rehabilitation management of conversion disorder with motor dysfunction. *Journal of Rehabilitation Sciences* 1996;**9**:122-5.

- w71. Vuilleumier P, Chicherio C, Assal F, Schwartz S, Skusman D, Landis T. Functional neuroanatomical correlates of hysterical sensorimotor loss. *Brain* 2001;**124**:1077-90.
- w72. Watanabe TK, O'Dell MW, Togliatti TJ. Diagnosis and rehabilitation strategies for patients with hysterical hemiparesis: a report of four cases. *Arch.Phys.Med.Rehabil.* 1998;**79**:709-14.
- w73. Weinstein EA, Lyerly OG. Conversion hysteria following brain injury. *Arch.Neurol.* 1966;**15**:545-8.
- w74. Weiser HI. Motor sensory dysfunction of upper limb due to conversion syndrome. *Arch.Phys.Med.Rehabil.* 1976;**57**:17-9.
- w75. White A, Corbin DO, Coope B. The use of thiopentone in the treatment of non-organic locomotor disorders. *J.Psychosom.Res.* 1988;**32**:249-53.
- w76. Withrington RH, Wynn Parry CB. Rehabilitation of conversion paralysis. *J.Bone Joint Surg.[Br.]* 1985;**67**:635-7.
- w77. Yuan YM, Tian YQ, Fan LM, Kuang PG, Wang GP, Zhang FY, Lang SY. Hysterical paralysis treated with acupuncture and erythrocyte acetylcholinesterase. *J.Tradit.Chin Med.* 1987;**7**:235-7.
- w78. Ziv I, Djaldetti R, Zoldan Y, Avraham M, Melamed E. Diagnosis of "non-organic" limb paresis by a novel objective motor assessment: the quantitative Hoover's test. *J.Neurol.* 1998;**245(12)**:797-802.
- w79. Deuschl G, Koster B, Lucking CH, Scheidt C. Diagnostic and pathophysiological aspects of psychogenic tremors. *Mov Disord.* 1998;**13**:294-302.
- w80. Williams DT, Ford B, Fahn S. Phenomenology and psychopathology related to psychogenic movement disorders. *Adv.Neurol.* 1995;**65**:231-57.
- w81. Scheidt CE, Koster B, Deuschl G. Diagnose, symptomatik und verlauf des psychogenen tremors. *Nervenarzt* 1996;**67**:198-204.
- w82. Edwards JG. Electro-convulsive therapy in the treatment of bizarre psychogenic movements. *British Journal of Psychiatry* 1969;**115**:1065-7.

- w83. Factor SA, Podskalny GD, Molho ES. Psychogenic movement disorders: frequency, clinical profile, and characteristics. *J.Neurol.Neurosurg.Psychiatry* 1995;**59**:406-12.
- w84. Fogel S. Psychogenic tremor and asomatognosia. *American Journal of Clinical Hypnosis* 1976;**19**:57-61.
- w85. Katthagen BD, Scheuer I. Der posttraumatische 'psychogene klumpfuß'. *Arch.Orthop.Trauma Surg.* 1980;**97**:193-5.
- w86. Kim YJ, Pakiam AS, Lang AE. Historical and clinical features of psychogenic tremor: a review of 70 cases. *Can.J.Neurol.Sci.* 1999;**26**:190-5.
- w87. Lang AE. Psychogenic dystonia: a review of 18 cases. *Can.J.Neurol.Sci.* 1995;**22**:136-43.
- w88. Lang AE, Koller WC, Fahn S. Psychogenic parkinsonism. *Arch.Neurol.* 1995;**52**:802-10.
- w89. Louis DS, Lamp MK, Greene TL. The upper extremity and psychiatric illness. *J.Hand Surg.[Am.]* 1985;**10**:687-93.
- w90. McAuley JH, Rothwell JC, Marsden CD, Findley LJ. Electrophysiological aids in distinguishing organic from psychogenic tremor. *Neurology* 1998;**50**:1882-4.
- w91. Michelson JD. Psychogenic equinovarus: The importance of recognition and non-operative treatment. *Foot & Ankle International* 2000;**21**:31-7.
- w92. Min SK, Lee BO. Laterality in somatization. *Psychosom.Med.* 1997;**59**:236-40.
- w93. Moene FC, Hoogduin KAL. The creative use of unexpected responses in the hypnotherapy of patients with conversion disorders. *International Journal of Clinical & Experimental Hypnosis* 1999;**47**:209-26.
- w94. Monday K, Jankovic J. Psychogenic myoclonus. *Neurology* 1993;**43**:349-52.
- w95. Ranawaya R, Riley D, Lang A. Psychogenic dyskinesias in patients with organic movement disorders. *Movement Disorders* 1990;**5**:127-33.



- w96. Roelofs K, Naring GW, Moene FC, Hoogduin CA. The question of symptom lateralization in conversion disorder. *J.Psychosom.Res.* 2000;**49**:21-5.
- w97. Scholten JM, Stam FC. Conversion hysteria. *Psychiatr.Neurol.Neurochir.* 1966;**69**:313-28.
- w98. Simmons BP, Vasile RG. The clenched fist syndrome. *J.Hand Surg.[Am.]* 1980;**5**:420-7.
- w99. Spiegel J, Heiss C, Fruhauf E, Fogel W, Meinck HM. [Polygraphic validation of distraction tasks in clinical differential tremor diagnosis]. *Nervenarzt* 1998;**69**:886-91.
- w100. Vargas AP, Carod-Artal FJ, Del Negro MC, Rodrigues MP. Distonia psicogênica : relato de dois casos. *Arq Neuropsiquiatr.* 2000;**58**:522-30.
- w101. Walters AS, Boudwin J, Wright D, Jones K. Three hysterical movement disorders. *Psychol.Rep.* 1988;**62**:979-85.
- w102. Regan J, LaBarbera JD. Lateralization of conversion symptoms in children and adolescents. *Am.J.Psychiatry* 1984;**141**:1279-80.
- w103. Gold S. Diagnosis and management of hysterical contractures in children. *BMJ* 1965;**1**:21-3.
- w104. Goodyer I. Hysterical conversion reactions in childhood. *Journal of Child Psychology & Psychiatry & Allied Disciplines* 1981;**22**:179-88.
- w105. Bangash IH, Worley G, Kandt RS. Hysterical conversion reactions mimicking neurological disease. *American Journal of Diseases of Children* 1988;**142**:1203-6.
- w106. Brooksbank DJ. Management of conversion reaction in five adolescent girls. *J.Adolesc.* 1984;**7**:359-76.
- w107. Forbis OL, Jones RH. Hysteria in Childhood. *South.Med.J.* 1965;**58**:1221.
- w108. Kotsopoulos S, Snow B. Conversion disorders in children: A study of clinical outcome. *Psychiatr.J.Univ.Ottawa* 1986;**11**:134-9.

- w109. Oberfield RA, Reuben RN, Burkes LJ. Interdisciplinary approach to conversion disorders in adolescent girls. *Psychosomatics* 1983;**24**:983-9.
- w110. Rock NL. Conversion reactions in childhood: a clinical study on childhood neuroses. *Journal of the American Academy of Child Psychiatry* 1971;**10**:65-93.
- w111. Wewetzer C, Warnke A. Differentialdiagnose einer 'konversionsstörung'. *Zeitschrift Fur Kinder-Und Jugendpsychiatrie Und Psychotherapie* 1999;**27**:221-6.
- w112. Pascuzzi RM. Nonphysiological (functional) unilateral motor and sensory syndromes involve the left more often than the right body. *J.Nerv.Ment.Dis.* 1994;**182**:118-20.
- w113. Stern DB. Handedness and the lateral distribution of conversion reactions. *J.Nerv.Ment.Dis.* 1977;**164**:122-8.
- w114. Fallik A, Sigal M. Hysteria: The choice of symptom site. *Psychother.Psychosom.* 1971;**19**:310-8.
